# Supplementary material for: Enhanced Top-Down Protein Characterization with Electron Capture Dissociation and Cyclic Ion Mobility Spectrometry
Source: PubMed Central journal article supplement — Anal Chem. 2022 Feb 21;94(9):3888–96. doi: 10.1021/acs.analchem.1c04870 (PMC8908312; doi:10.1021/acs.analchem.1c04870), 2022-02-21
Supplement: ac1c04870_si_001.pdf [file ac1c04870_si_001.pdf]

## Supporting Information

### Enhanced Top-Down Protein Characterization with Electron Capture Dissociation and Cyclic Ion Mobility Spectrometry

Jared B. Shaw <sup>1\*</sup>, Dale A. Cooper-Shepherd <sup>2</sup>, Darren Hewitt<sup>2</sup>, Jason L. Wildgoose <sup>2</sup>, Joseph S. Beckman <sup>1,3</sup>, James I. Langridge <sup>2</sup>, Valery G. Voinov <sup>1</sup>

<sup>1</sup> e-MSion Inc., 2121 NE Jack London Street, Corvallis, Oregon 97330, United States

<sup>2</sup> Waters Corporation, Wilmslow, Cheshire, UK, SK9 4AX

<sup>3</sup> Linus Pauling Institute and the Department of Biochemistry and Biophysics, Oregon State University, Corvallis, Oregon 97331, United States

Corresponding author

\* E-mail: [jared.shaw@e-msion.com](mailto:jared.shaw@e-msion.com)

## Contents

**Figure S1.** Product ion maps for pre-IMS ECD of 10+ ubiquitin produced by the combined results of four mobility fraction (top), or a single mass spectrum produced by combing the entire drift time range.

**Figure S2.** Product ion maps for each mobility fraction from pre-IMS ECD of 10+ ubiquitin.

**Figure S3.** Product ion maps for the five mobility fractions produced by pre-IMS ECD of 35+ bovine carbonic anhydrase II.

**Figure S4.** Raw mass spectra for the five mobility fractions and combined drift time produced by pre-IMS ECD of 35+ bovine carbonic anhydrase. Spectra in the right column are zoomed in to an intensity of 4.8E3.

**Figure S5.** Product ion maps for pre-IMS ECD of 35+ bovine carbonic anhydrase II produced by the combined results of five mobility fraction (top) or a single mass spectrum produced by combing the entire drift time range.

**Figure S6.** The 2D mobiligram ( $m/z$  vs. drift time) for pre-cIMS ECD of the 11+ charge state of bovine carbonic anhydrase II (A) with outlined mobility fractions. The number of annotated isotope clusters/unique ions and sequence coverage for in each mobility fraction (B). Comparison of the number of unique isotope clusters and unique ions observed from a single mass spectrum from all drift times combined and the combined results of the four mobility fractions (C).

**Figure S7.** Product ion maps for the five mobility fractions produced by pre-IMS ECD of 11+ bovine carbonic anhydrase II.

**Figure S8.** Product ion maps for pre-IMS ECD of 11+ bovine carbonic anhydrase II produced by a single mass spectrum of the entire drift time range combined.

### Combined mobility fractions: 96% coverage

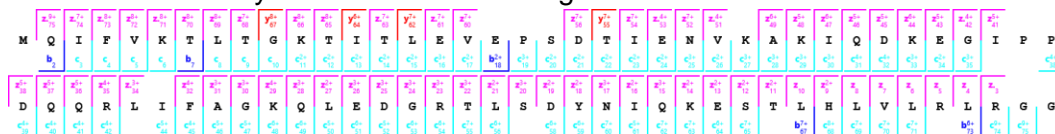

### Combined drift time: 96% coverage

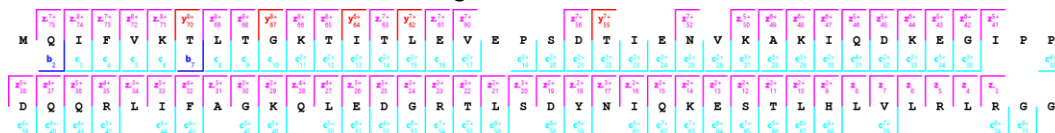

Figure S1. Product ion maps for pre-IMS ECD of 10+ ubiquitin produced by the combined results of four mobility fraction (top), or a single mass spectrum produced by combing the entire drift time range.

### F1: 40% coverage

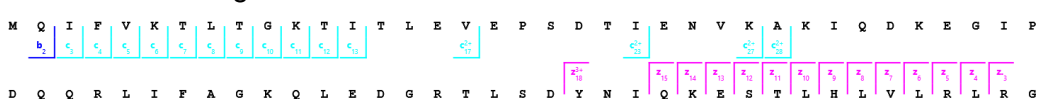

### F2: 92% coverage

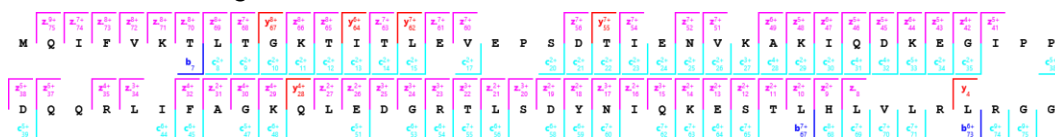

### F3: 67% coverage

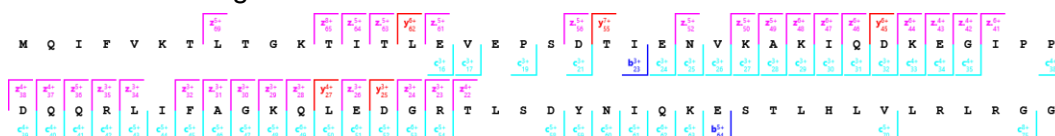

### F4: 47% coverage

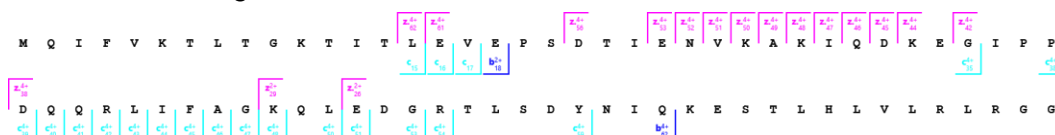

Figure S2. Product ion maps for each mobility fraction from pre-IMS ECD of 10+ ubiquitin.

### F1: 20% coverage

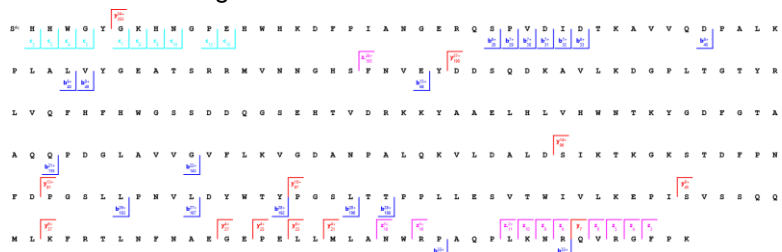

### F2: 52% coverage

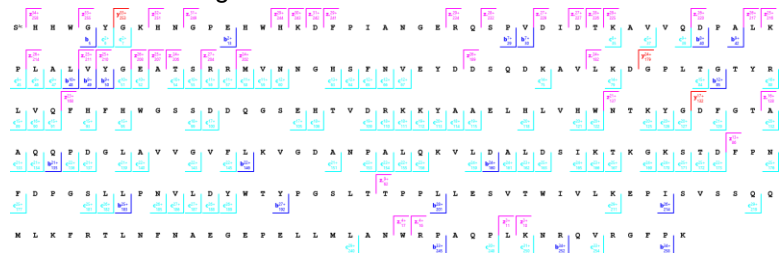

### F3: 51% coverage

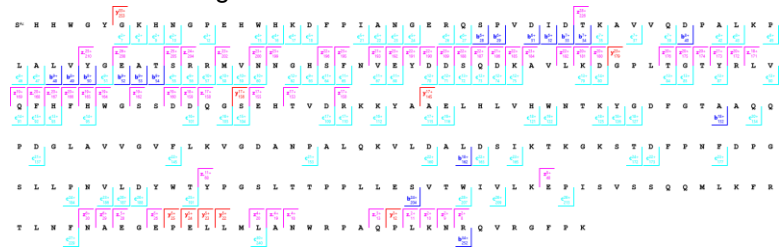

### F4: 67% coverage

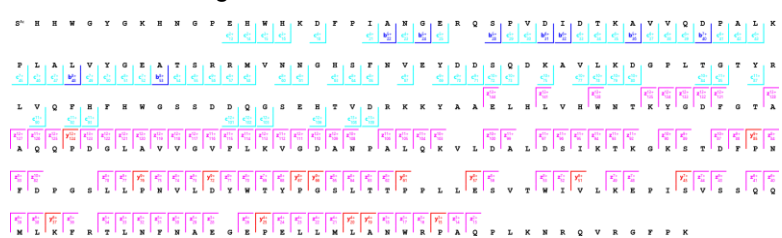

### F5: 56% coverage

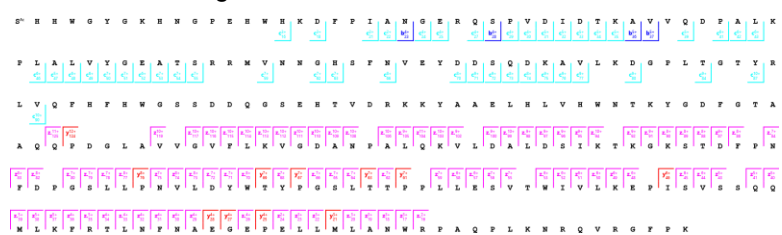

Figure S3. Product ion maps for the five mobility fractions produced by pre-IMS ECD of 35+ bovine carbonic anhydrase II.

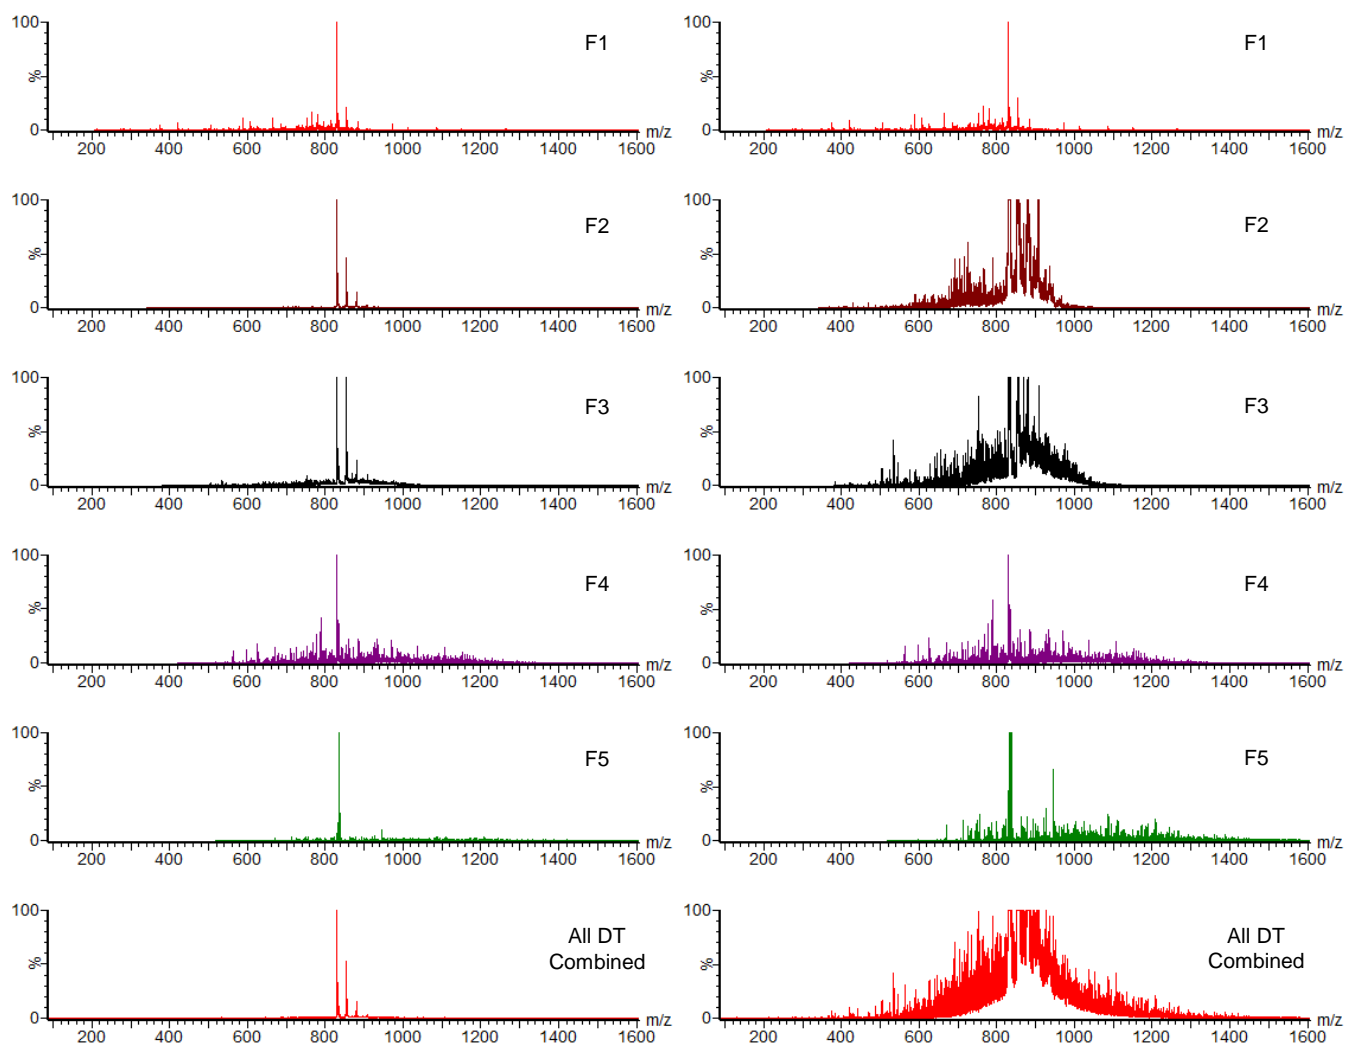

Figure S4. Raw mass spectra for the five mobility fractions and combined drift time produced by pre-IMS ECD of 35+ bovine carbonic anhydrase. Spectra in the right column are zoomed in to an intensity of  $4.8E3$ .

Combined mobility fractions: 89% sequence coverage

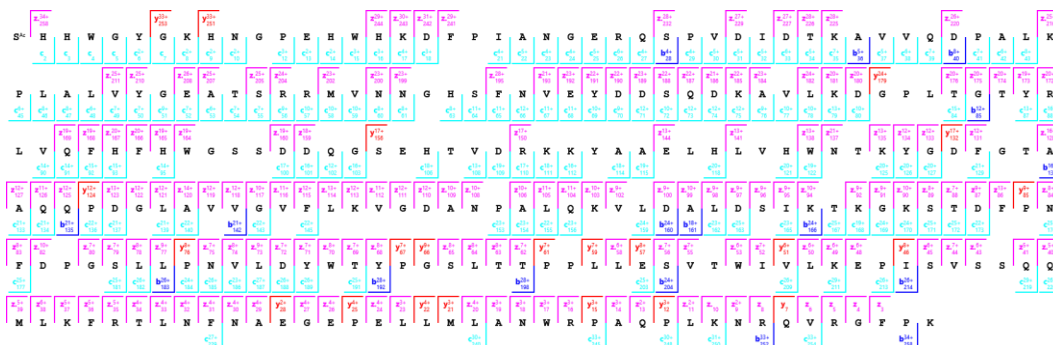

Combined drift time: 64% sequence coverage

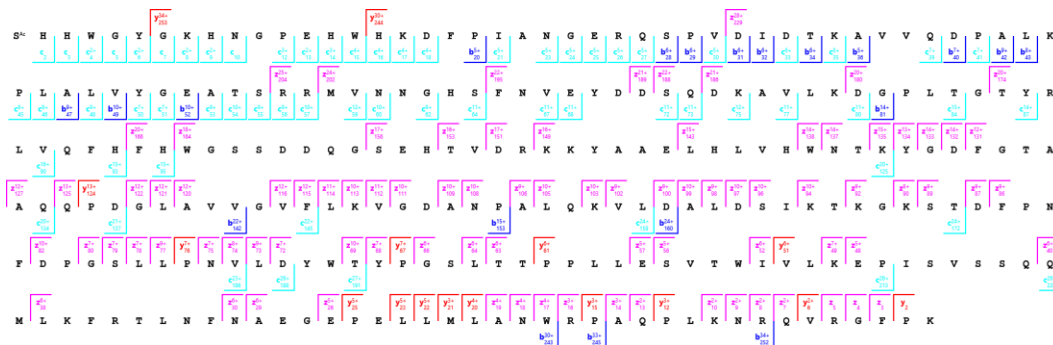

Figure S5. Product ion maps for pre-IMS ECD of 35+ bovine carbonic anhydrase II produced by the combined results of five mobility fraction (top) or a single mass spectrum produced by combining the entire drift time range.

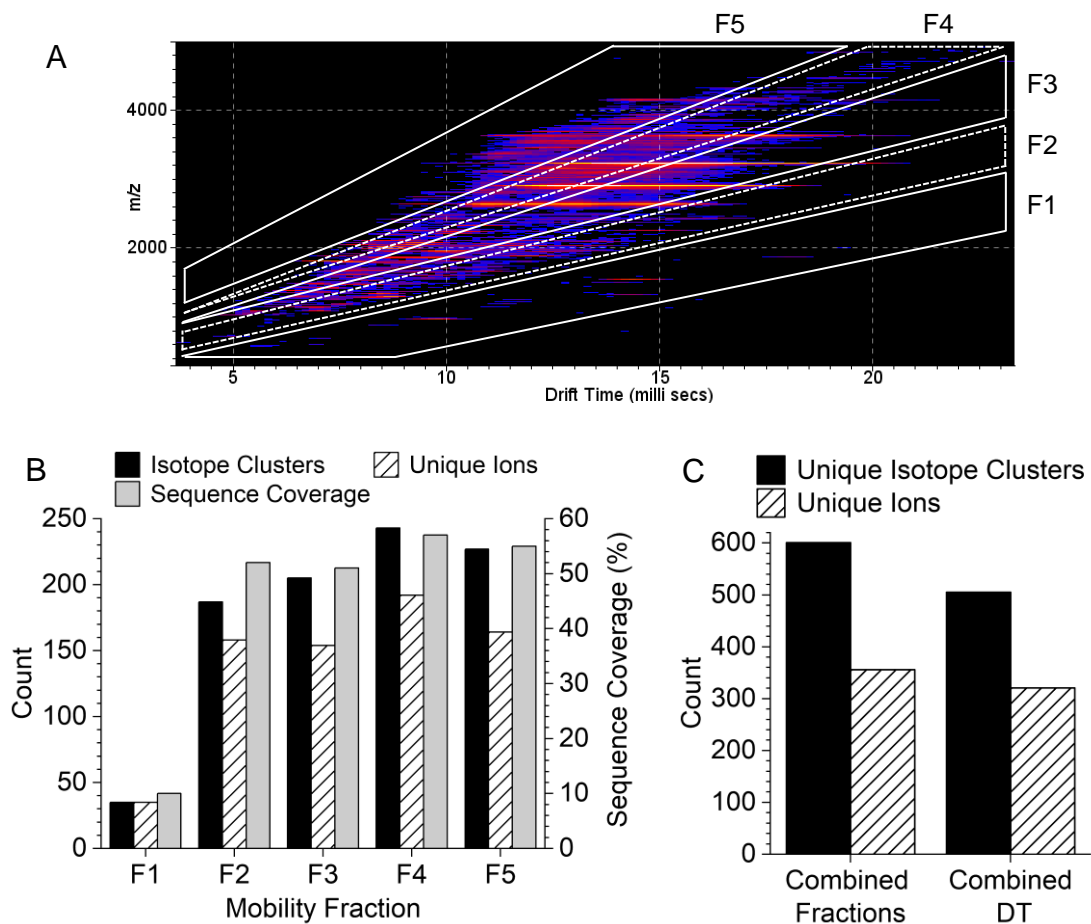

Figure S6. The 2D mobiligram ( $m/z$  vs. drift time) for pre-cIMS ECD of the 11+ charge state of bovine carbonic anhydrase II (A) with outlined mobility fractions. The number of annotated isotope clusters/unique ions and sequence coverage for in each mobility fraction (B). Comparison of the number of unique isotope clusters and unique ions observed from a single mass spectrum from all drift times combined and the combined results of the four mobility fractions (C).

### F1: 11% sequence coverage

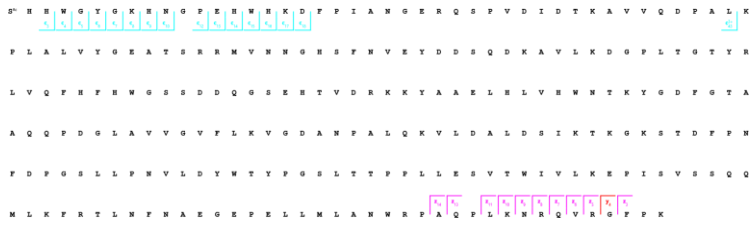

### F2: 52% sequence coverage

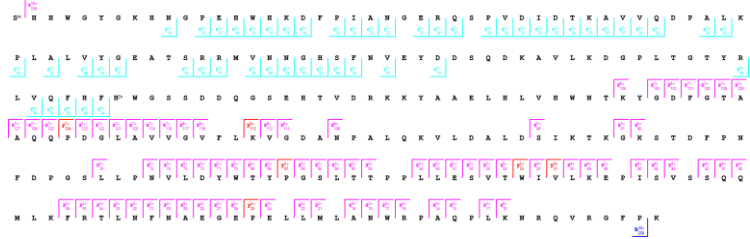

### F3: 51% sequence coverage

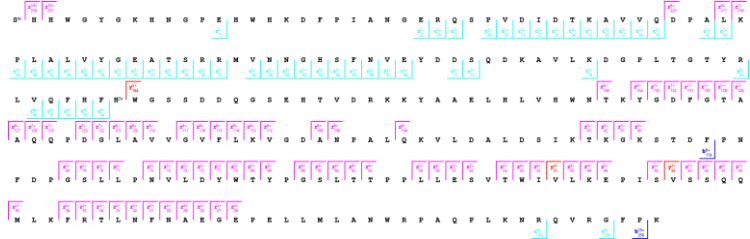

### F4: 57% sequence coverage

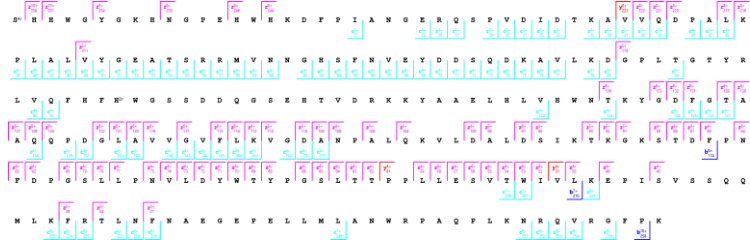

### F5: 55% sequence coverage

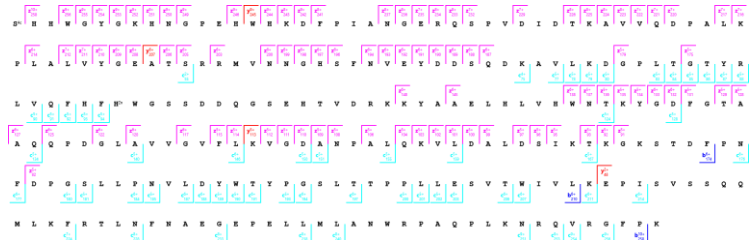

Figure S7. Product ion maps for the five mobility fractions produced by pre-IMS ECD of 11+ bovine carbonic anhydrase II.



Combined drift time: 75% sequence coverage

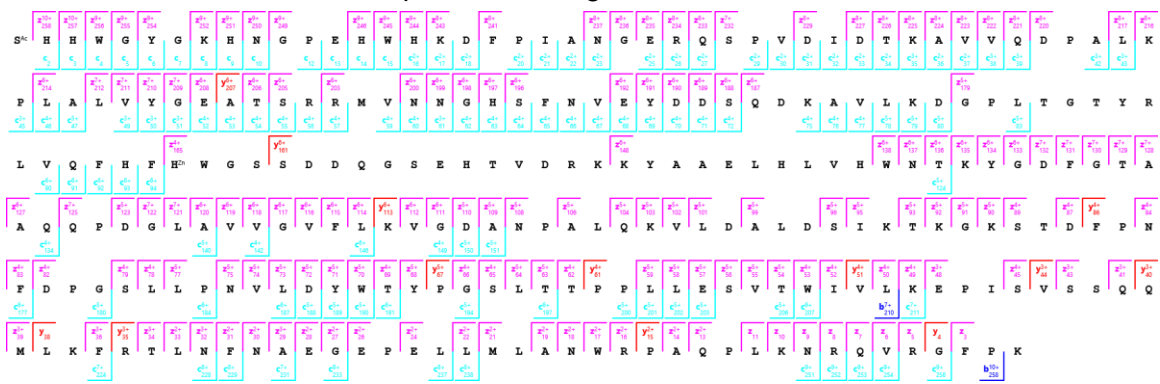

Figure S8. Product ion maps for pre-IMS ECD of 11+ bovine carbonic anhydrase II produced by a single mass spectrum of the entire drift time range combined.
